# Supplementary material for: Frailty severity is significantly associated with electrocardiographic QRS duration in chronic dialysis patients
Source: PeerJ. 2015 Oct 22;3:e1354. doi: 10.7717/peerj.1354 (PMC4627921; doi:10.7717/peerj.1354)
Supplement: Supplemental Information 1 [file peerj-03-1354-s001.xls]

## Sheet: Sheet1
Patient number	Age	BMI	Marriage	Gender	Vintage (年)	DM (1)	HTN (0)	CHF (3)	Malignancy (2)	Thyroid	Dialysis_comorbidity_index	Etiology_of_ESRD	ESRD_Etiology_code	CRP	Domain 1	Domain 1	Domain 1	Domain 1	Domain 2	Domain 2	Domain 3	Domain 3	Domain 3	Domain 3	Domain 4	Domain 4	Domain 4	Domain 4	Domain 4	Domain 4	Strawbridge questionnaire (1 or higher)	Frailty	C1	2	2	3	4	5	5	6	7	8	9	Edmonton Frail Scale (total 17)	Frailty	Domain 1	Domain 2	Domain 3	Domain 4
J000680	68	23.9563	1	0	6.833	0	1	0	0	0	2		9	0.326	2	1	1	2	1	1	2	3	3	3	2	1	3	2	3	3	2	1	1	0	1	2	1	1	0	0	1	0	1	8	1	0	1	1	0
J033761	49	21.9713	1	1	1	1	1	1	0	0	6	DM	1	0.176	1	1	1	1	1	1	1	1	1	1	1	1	1	2	1	1	0	0	0	1	0	0	0	1	0	0	0	0	0	2	0	0	0	0	0
J028525	75	19.0596	1	0	8	0	1	0	0	1	0		9	0.073	3	4	1	2	2	2	3	2	3	3	2	1	2	2	2	2	2	1	1	0	1	0	0	1	1	0	1	0	2	7	0	1	1	0	0
J013609	79	23.7	1	0	0.333333	0	1	0	0	0	0	Unknown	9	0.82	2	2	2	2	0	0	1	1	1	1	4	2	2	1	1	1	1	1	1	2	2	1	0	1	0	0	0	0	2	9	1	0	1	1	0
J001587	79	24.1548	1	0	3.5	0	1	0	0	0	0		9	0.441	1	1	1	1	1	2	1	1	1	2	2	2	2	2	3	3	1	1	0	0	1	0	2	1	0	1	0	0	1	6	0	0	0	0	0
J012608	82	24.1566	1	0	2.833	1	1	1	0	0	4	AKI	3	0.719	2	2	2	2	1	1	2	2	2	2	4	2	4	1	1	1	1	1	1	0	2	0	1	1	0	0	0	0	0	5	0	1	1	1	0
J003276	73	20.3428	1	0	2	0	0	0	1	0	2	Graft failure	6	0.333	4	4	4	4	1	1	1	2	2	3	4	1	4	4	1	1	3	1	1	2	2	0	0	1	0	0	1	0	2	9	1	1	1	1	1
J014201	73	21.7107	1	0	5.75	0	1	0	0	0	0		9	2.196	4	4	4	4	3	3	2	2	2	3	4	2	3	3	3	3	4	1	2	1	2	2	1	1	0	0	1	0	2	12	1	1	1	1	1
J017160	84	24.2954	1	0	3	1	1	1	0	1	4	DM	1	1.042	4	4	4	4	1	2	3	3	3	3	4	1	4	1	2	2	3	1	2	2	2	0	1	1	0	0	0	1	0	9	1	1	1	1	1
J010223	75	24.6181	1	1	2	1	0	0	0	0	1	DM	1	0.313	2	2	2	2	1	1	1	1	1	1	1	1	1	1	1	1	0	0	0	1	1	2	2	1	0	0	0	0	2	9	1	0	1	0	0
J006067	66	23.8754	1	1	2.92	0	1	0	0	0	0	NSAID	8	0.8	1	1	1	1	1	1	1	1	1	1	1	1	1	1	1	1	0	0	0	1	1	0	1	1	1	0	0	0	1	6	0	0	0	0	0
J042481	60	20.4635	1	1	4.17	1	0	0	0	0	1	DM	1	0.02	1	1	1	4	1	1	1	1	1	1	1	2	1	1	1	1	1	1	0	1	1	0	0	1	0	0	0	0	0	3	0	0	1	1	0
J000236	59	20.1333	1	0	1.83	0	1	0	0	1	0	Unknown	9	0.148	2	1	2	2	2	1	2	1	2	2	1	1	1	2	2	2	0	0	0	0	1	1	0	0	1	0	1	0	1	5	0	0	0	0	0
J009883	57	26.5338	1	0	1.92	1	1	0	1	0	3	DM	1	0.669	4	1	4	4	4	4	2	2	2	2	3	2	4	4	4	4	3	1	2	2	2	2	1	1	0	1	1	0	2	14	1	0	1	1	0
J013696	73	22.5686	1	1	2.17	0	0	1	1	0	5		9	0.135	1	1	1	1	1	1	2	1	2	1	1	1	1	1	2	2	0	0	0	0	1	0	1	0	1	0	0	0	1	4	0	0	0	0	0
J051493	55	22.8	1	1	0.75	1	1	0	0	0	1	DM	1	0.701	1	2	2	1	1	1	1	1	1	1	4	1	1	1	2	1	1	1	0	0	2	0	0	1	0	0	0	0	0	3	0	0	1	1	0
J000565	88	25.2922	1	0	4	1	1	1	0	0	4	DM	1	1.433	4	2	4	2	2	2	1	1	3	2	3	4	4	2	1	1	3	1	1	1	1	2	0	1	0	0	0	1	2	9	1	1	1	1	0
J013983	66	19.4104	1	1	3.92	0	1	0	0	0	0		9	0.234	1	1	1	2	1	1	1	1	1	1	3	1	1	1	1	1	1	1	0	0	1	0	0	1	0	0	0	0	0	2	0	0	0	0	0
J042204	74	23.6718	0	1	2	1	1	0	0	0	3	DM	1	0.79	1	3	3	1	2	3	1	1	1	1	1	1	1	1	1	1	2	1	0	1	1	0	2	1	1	0	0	0	2	8	1	1	1	1	0
J040811	56	29.9032	1	0	10.92	0	1	0	0	0	0		9	0.577	1	1	1	2	1	1	2	2	3	2	1	1	1	1	2	2	1	1	0	0	1	0	0	0	1	0	1	0	0	3	0	1	1	0	0
J030651	76		1	0	0.66667	1	1	0	0	0	6	DM	1	0.81	1	1	1	1	1	1	1	1	1	1	1	1	1	1	1	1	0	0	0	0	0	0	0	0	0	0	0	0	0	0	0	0	1	1	0
J030614	65	23.634	0	1	4	0	1	0	0	0	0		9	0.823	1	1	1	1	1	1	2	2	2	2	1	1	1	1	1	1	0	0	0	1	1	2	2	0	1	0	0	0	2	9	1	0	0	0	0
J056060	63	18.2	1	0	0.416667	1	1	0	0	0	2	DM	1	0.84	2	1	1	1		1	1	1	1	2	4	1	4	1	1	1	1	1	1	1	1	0	0	1	1	0	1	0	1	7	0	0	1	1	0
J010231	62	25.4735	1	0	1.58	1	1	0	0	0	1	DM	1	0.049	2	1	2	2	1	1	1	1	1	1	4	2	2	1	1	1	1	1	0	2	1	2	1	1	0	0	0	0	1	8	1	1	1	0	0
J018176	81	24.898	1	0	0.75	1	1	0	0	1	1	DM	1	0.228	1	1	1	1	1	2	1	1	1	2	2	2	4	2	2	2	1	1	1	0	1	1	0	1	0	0	0	0	2	6	0	0	1	1	0
J040481	70	25.2465	1	0	0.75	1	1	0	0	0	1	DM	1	0.472	2	2	2	2	1	1	1	1	1	1	3	3	3	3	3	3	1	1	1	1	2	2	1	1	1	0	0	0	0	9	1	0	0	1	0
J000357	81	23.2674	1	1	2	1	1	0	0	0	1	CGN	2	0.383	2	2	2	3	2	2	3	3	3	3	3	2	3	4	4	4	3	1	1	0	1	2	1	1	1	0	1	0	2	10	1	0	1	0	1
J043025	54	21.4309	1	0	0.5	0	1	0	0	0	0	CGN	2	6.887	1	1	1	2	1	1	2	2	2	2	2	2	2	2	2	2	0	0	0	0	2	0	1	1	1	0	1	0	1	7	0	0	0	0	0
J043045	77	21.9	1	0	9.42	1	1	0	0	0	1	DM	1	0.169	2	2	2	2	1	1	1	1	1	1	2	2	2	1	2	1	0	0	0	2	2	1	1	1	0	0	0	0	2	9	1	0	1	1	1
J019769	69	23.4432	1	1	3.42	0	1	1	0	0	5		9	0.342	1	1	1	2	1	1	1	1	1	1	2	2	2	2	2	1	0	0	0	0	1	1	0	1	0	0	1	0	1	5	0	0	0	0	0
J046929	70	24.6956	1	0		0	1	1	0	0	3		9	0.549	3	4	4	4	3	3	4	4	3	3	4	4	3	1	3	2	4	1	0	1	2	0	1	1	1	0	1	0	1	8	1	0	1	1	1
J023427	52	17.1534	1	1	0.83	1	1	0	0	0	1	AKI	3	0.208	1	1	1	1	1	2	1	1	1	1	4	4	4	1	1	1	1	1	1	1	2	0	0	1	0	0	1	0	1	7	0	0	1	0	0
J031028	66	26.1752	1	1	4	0	1	0	0	0	0	AKI	3	0.027	1	1	1	1	1	1	1	1	1	1	2	2	1	1	1	1	0	0	0	0	1	0	0	1	0	0	0	0	1	3	0	0	0	0	0
J006347	64	19.9965	1	0	2.08	0	1	0	0	0	0	Unknown	9	0.71	2	2	2	1	1	1	1	1	1	2	4	1	1	1	1	1	1	1	0	0	1	2	2	0	1	0	0	0	2	8	1	0	1	1	0
J045910	34	21.2808	0	1	1.92	0	1	0	0	0	0	Graft failure	6	0.547	1	1	1	1	1	2	3	1	2	2	1	1	1	1	1	1	1	1	0	0	1	1	1	1	1	0	0	0	0	5	0	0	0	0	0
J051250	64	14.8571	1	1	0.83	0	0	0	0	0	0	Obstructive uropathy	7	2.02	4	4	4	4	1	1	1	1	1	1	1	1	2	1	1	1	1	1	0	1	1	2	0	1	0	0	0	1	2	8	1	0	1	1	0
J004036	76	27.0552	1	0	0.42	1	1	0	0	0	1	DM	1	0.063	3	3	3	3	1	1	2	2	2	2	3	3	3	3	3	3	2	1	0	1	1	1	0	1	0	0	1	0	0	5	0	1	0	0	0
J002322	71	26.9633	1	1	0.291667	1	1	0	1	1	3	DM	1	0.81	2	1	3	2	1	1	1	2	2	2	2	2	2	3	3	2	2	1	1	1	2	1	0	1	1	0	1	0	1	9	1	0	0	0	0
J020601	78	21.6713	1	1	0.83	0	1	0	0	0	0		9	3.073	1	1	4	1	1	1	1	1	1	1	4	1	4	1	1	1	2	1	1	0	2	2	0	1	0	0	0	0	2	8	1	0	0	1	0
J003151	73	25.14	1	1	0.17	0	1	0	1	0	0	CGN	2	0.339	1	1	4	1	1	1	1	1	1	1	4	1	4	1	1	1	2	1	0	0	1	0	0	1	1	0	0	0	1	4	0	0	1	0	0
J017857	69	25.1743	1	0	2.83	0	0	1	0	0	3		9	0.387	1	1	1	1	1	2	1	1	2	2	4	2	4	1	1	1	1	1	0	1	1	0	0	0	1	0	0	0	2	5	0	0	1	0	0
[truncated: 85 more columns]

## Sheet: No CHF
Patient	IDWG	Patient number	Age	BMI	Geographic distance (km)	Geographic distance (>10km)	Transport time (min)	Transport time (>10min)	教育程度	Education	婚姻	Gender	Vintage (年)	DM (1)	HTN (0)	CHF (3)	Cirrhosis (2)	Malignancy (2)	Thyroid	Autoimmune	Dialysis_comorbidity_index	Etiology_of_ESRD	ESRD_Etiology_code	Disposable Income (NTD10000 below or above)	CRP(2014-5月)	Domain 1_平衡	Domain 1_手無力	Domain 1_腳無力	Domain 1_姿勢性頭暈	Domain 2_體重減輕	Domain 2_食慾變差	Domain 3_話講不出來	Domain 3_很難專心	Domain 3_很難記住事情	Domain 3_常忘記東西放哪	Domain 4_看報紙困難	Domain 4_看對街困難	Domain 4_路標看不到	Domain 4_電話聽不清	Domain 4_房間吵聊天	Domain 4_聊天聽清楚	Strawbridge questionnaire (幾個domain, 1 or higher)	Frailty	認知1_畫時鐘	身體健康2_住院頻率	身體健康2_自己描述	生活功能3_活動需幫助	社會支援4_放心交代人	藥物使用5_規律五種藥
李林甜	1	J000680	68	23.9563	2.6	0	7	0	國中	2	1	0	6.833	0	1	0	1	0	0	0	2		9	1	0.326	2	1	1	2	1	1	2	3	3	3	2	1	3	2	3	3	2	1	1	0	1	2	1	1
李蝦	0	J028525	75	19.0596	1.6	0	5	0	無	0	1	0	8	0	1	0	0	0	1	0	0		9	0	0.073	3	4	1	2	2	2	3	2	3	3	2	1	2	2	2	2	2	1	1	0	1	0	0	1
李莊招治	0	J013609	79	23.7	2.1	0	6	0	無	0	1	0	0.333333	0	1	0	0	0	0	0	0	Unknown	9	1		2	2	2	2	0	0	1	1	1	1	4	2	2	1	1	1	1	1	1	2	2	1	0	1
何藝	0	J001587	79	24.1548	2.7	0	5	0	無	0	1	0	3.5	0	1	0	0	0	0	0	0		9	1	0.441	1	1	1	1	1	2	1	1	1	2	2	2	2	2	3	3	1	1	0	0	1	0	2	1
王梁牡丹	0	J003276	73	20.3428	1.3	0	4	0	無	0	1	0	2	0	0	0	0	1	0	0	2	Graft failure	6	1	0.333	4	4	4	4	1	1	1	2	2	3	4	1	4	4	1	1	3	1	1	2	2	0	0	1
劉江玉	0	J014201	73	21.7107	9.3	0	15	1	無	0	1	0	5.75	0	1	0	0	0	0	1	0		9	1	2.196	4	4	4	4	3	3	2	2	2	3	4	2	3	3	3	3	4	1	2	1	2	2	1	1
蔡政村	0	J010223	75	24.6181	7.9	0	13	1	無	0	1	1	2	1	0	0	0	0	0	0	1	DM	1	0	0.313	2	2	2	2	1	1	1	1	1	1	1	1	1	1	1	1	0	0	0	1	1	2	2	1
張鵬	0	J006067	66	23.8754	1.6	0	5	0	國小	1	1	1	2.92	0	1	0	0	0	0	0	0	NSAID	8	0		1	1	1	1	1	1	1	1	1	1	1	1	1	1	1	1	0	0	0	1	1	0	1	1
曾聰明	0	J042481	60	20.4635	26.9	1	47	1	國小	1	1	1	4.17	1	0	0	0	0	0	0	1	DM	1	0	0.02	1	1	1	4	1	1	1	1	1	1	1	2	1	1	1	1	1	1	0	1	1	0	0	1
賴惠敏	0	J000236	59	20.1333	0.85	0	3	0	大學	4	1	0	1.83	0	1	0	0	0	1	1	0	Unknown	9	1	0.148	2	1	2	2	2	1	2	1	2	2	1	1	1	2	2	2	0	0	0	0	1	1	0	0
廖紅棕	0	J009883	57	26.5338	3.1	0	6	0	國小	1	1	0	1.92	1	1	0	0	1	0	0	3	DM	1	0	0.669	4	1	4	4	4	4	2	2	2	2	3	2	4	4	4	4	3	1	2	2	2	2	1	1
許清其	1	J051493	55	22.8	10.1	1	17	1	國小	1	1	1	0.75	1	1	0	0	0	0	0	1	DM	1	1	0.701	1	2	2	1	1	1	1	1	1	1	4	1	1	1	2	1	1	1	0	0	2	0	0	1
蔡坤池	0	J013983	66	19.4104	0.75	0	3	0	國小	1	1	1	3.92	0	1	0	0	0	0	0	0		9	0	0.234	1	1	1	2	1	1	1	1	1	1	3	1	1	1	1	1	1	1	0	0	1	0	0	1
張阿義	1	J042204	74	23.6718	1.1	0	3	0	專科	3	0	1	2	1	1	0	1	0	0	0	3	DM	1	0		1	3	3	1	2	3	1	1	1	1	1	1	1	1	1	1	2	1	0	1	1	0	2	1
楊美嬌	0	J040811	56	29.9032	1	0	3	0	國小	1	1	0	10.92	0	1	0	0	0	0	0	0		9	0	0.577	1	1	1	2	1	1	2	2	3	2	1	1	1	1	2	2	1	1	0	0	1	0	0	0
許楊梅子	1	J030651	76		16	1	22	1	無	0	1	0	0.66667	1	1	0	0	0	0	0	6	DM	1	0																		0	0
羅德進	1	J030614	65	23.634	2.7	0	6	0	國小	1	0	1	4	0	1	0	0	0	0	0	0		9	0	0.823	1	1	1	1	1	1	2	2	2	2	1	1	1	1	1	1	0	0	0	1	1	2	2	0
陳黃足	0	J056060	63	18.2	9.5	0	15	1	無	0	1	0	0.416667	1	1	0	0	0	0	0	2	DM	1	1		2	1	1	1		1	1	1	1	2	4	1	4	1	1	1	1	1	1	1	1	0	0	1
林吳綉金	1	J010231	62	25.4735	4	0	9	0	無	0	1	0	1.58	1	1	0	0	0	0	0	1	DM	1	0	0.049	2	1	2	2	1	1	1	1	1	1	4	2	2	1	1	1	1	1	0	2	1	2	1	1
郭含笑	0	J018176	81	24.898	2.7	0	5	0	國小	1	1	0	0.75	1	1	0	0	0	1	0	1	DM	1	1	0.228	1	1	1	1	1	2	1	1	1	2	2	2	4	2	2	2	1	1	1	0	1	1	0	1
許簡美	1	J040481	70	25.2465	1.3	0	4	0	無	0	1	0	0.75	1	1	0	0	0	0	0	1	DM	1	1	0.472	2	2	2	2	1	1	1	1	1	1	3	3	3	3	3	3	1	1	1	1	2	2	1	1
高清金	0	J000357	81	23.2674	3.2	0	7	0	國小	1	1	1	2	1	1	0	0	0	0	0	1	CGN	2	1	0.383	2	2	2	3	2	2	3	3	3	3	3	2	3	4	4	4	3	1	1	0	1	2	1	1
李麗蘭	0	J043025	54	21.4309	17.4	1	33	1	高中	3	1	0	0.5	0	1	0	0	0	0	0	0	CGN	2	1	6.887	1	1	1	2	1	1	2	2	2	2	2	2	2	2	2	2	0	0	0	0	2	0	1	1
陳慧娟	1	J043045	77	21.9	17.4	1	33	1	國中	2	1	0	9.42	1	1	0	0	0	0	0	1	DM	1	1	0.169	2	2	2	2	1	1	1	1	1	1	2	2	2	1	2	1	0	0	0	2	2	1	1	1
張富豪	0	J023427	52	17.1534	1.9	0	5	0	國小	1	1	1	0.83	1	1	0	0	0	0	1	1	AKI	3	0	0.208	1	1	1	1	1	2	1	1	1	1	4	4	4	1	1	1	1	1	1	1	2	0	0	1
張再發	0	J031028	66	26.1752	10.4	1	15	1	無	0	1	1	4	0	1	0	0	0	0	0	0	AKI	3	0	0.027	1	1	1	1	1	1	1	1	1	1	2	2	1	1	1	1	0	0	0	0	1	0	0	1
簡彭秀嬌	1	J006347	64	19.9965	1.2	0	3	0	國小	1	1	0	2.08	0	1	0	0	0	0	0	0	Unknown	9	0	0.71	2	2	2	1	1	1	1	1	1	2	4	1	1	1	1	1	1	1	0	0	1	2	2	0
李錦堂	1	J045910	34	21.2808	1.9	0	5	0	國中	2	0	1	1.92	0	1	0	0	0	0	0	0	Graft failure	6	1	0.547	1	1	1	1	1	2	3	1	2	2	1	1	1	1	1	1	1	1	0	0	1	1	1	1
練維勇	0	J051250	64	14.8571	19	1	36	1	國小	1	1	1	0.83	0	0	0	0	0	0	0	0	Obstructive uropathy	7	1	2.02	4	4	4	4	1	1	1	1	1	1	1	1	2	1	1	1	1	1	0	1	1	2	0	1
潘素英	1	J004036	76	27.0552	1.5	0	4	0	國小	1	1	0	0.42	1	1	0	0	0	0	0	1	DM	1	1	0.063	3	3	3	3	1	1	2	2	2	2	3	3	3	3	3	3	2	1	0	1	1	1	0	1
許照男	1	J002322	71	26.9633	3.1	0	7	0	無	0	1	1	0.291667	1	1	0	0	1	1	1	3	DM	1	1		2	1	3	2	1	1	1	2	2	2	2	2	2	3	3	2	2	1	1	1	2	1	0	1
何阿輝	1	J020601	78	21.6713	12.7	1	21	1	無	0	1	1	0.83	0	1	0	0	0	0	0	0		9	0	3.073	1	1	4	1	1	1	1	1	1	1	4	1	4	1	1	1	2	1	1	0	2	2	0	1
許泰男	1	J003151	73	25.14	1	0	3	0	無	0	1	1	0.17	0	1	0	0	1	0	0	0	CGN	2	0	0.339	1	1	4	1	1	1	1	1	1	1	4	1	4	1	1	1	2	1	0	0	1	0	0	1
[truncated: 101 more columns]
